# Supplementary material for: Adaptation of human endothelial cells to physiological oxygen levels alters basal and nitric oxide-stimulated K + channel activity
Source: Research Square preprint supplement (doi:10.21203/rs.3.rs-7160282/v1), 2025-08-18
Supplement: Supplementary file 1 [file 0d61a2a81930f1bbdc6cf421.pdf]

## Supplementary Information

### Adaptation of human endothelial cells to physiological oxygen levels alters basal and nitric oxide-stimulated K<sup>+</sup> channel activity

Fan Yang<sup>1</sup>, Ashia Wheeler-Crawford<sup>2</sup>, Alan McIntyre<sup>2</sup>, Giovanni E. Mann<sup>1\*</sup> and Joern R. Steinert<sup>3\*</sup>

Figure 4 complete Western blot gels:

#### HUVEC

Kir6.1

Cultures 1-4

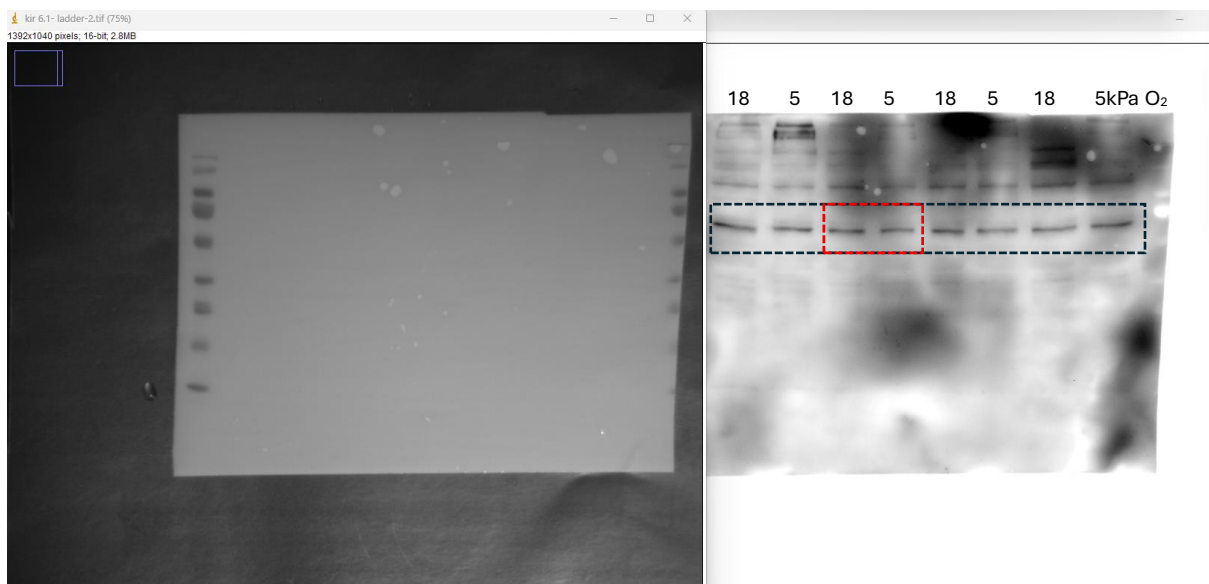

KCa2.3

Cultures 1-4

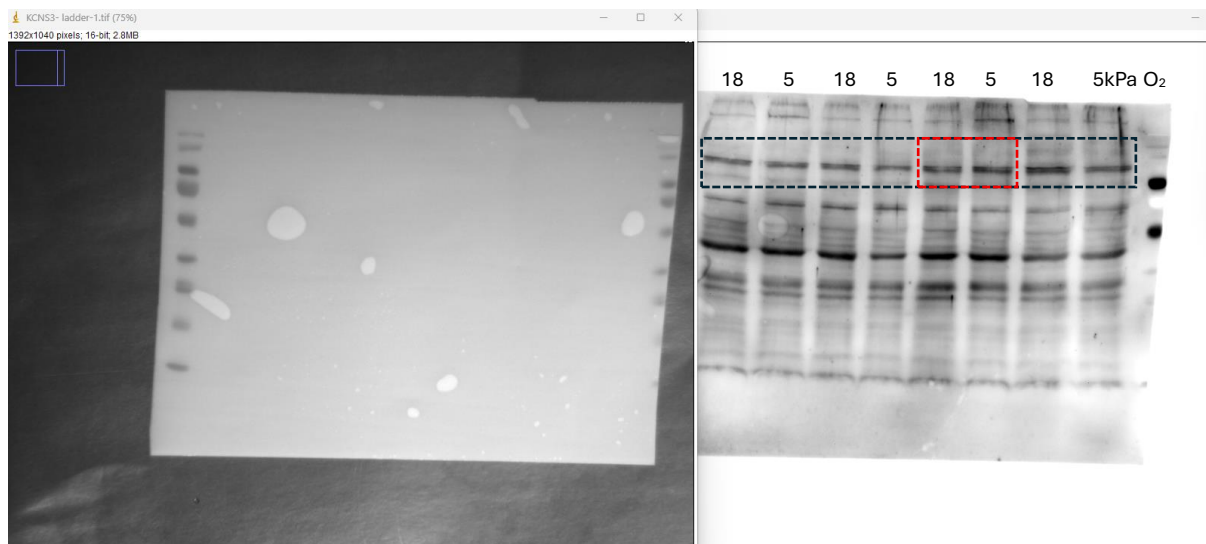

$\beta$ -actin

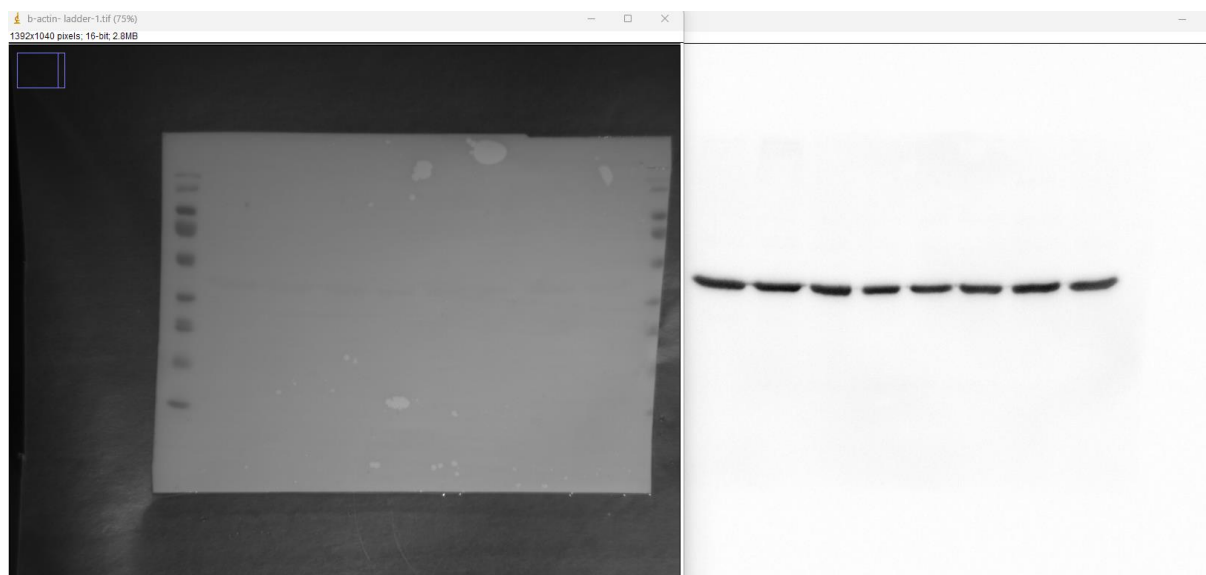

**HUVEC** (Product Code: CCD-6000; N=4 different cultures)

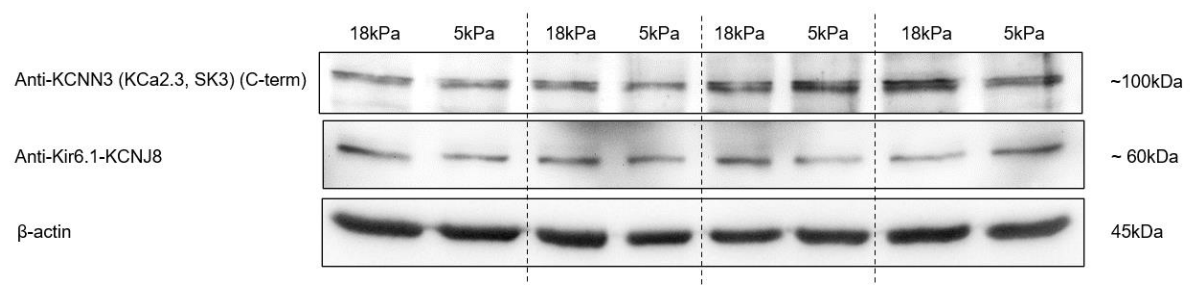

**Supp Fig 1a: Full gels of HUVEC WB shown in Fig 4.** Experiments were run in 4 independent cultures, lanes of immunostained proteins used for analysis are highlighted in dark dotted box with examples extracted for Fig 4 shown in red dotted box.

## hCMEC/D3

Kir6.1

Culture 1-3

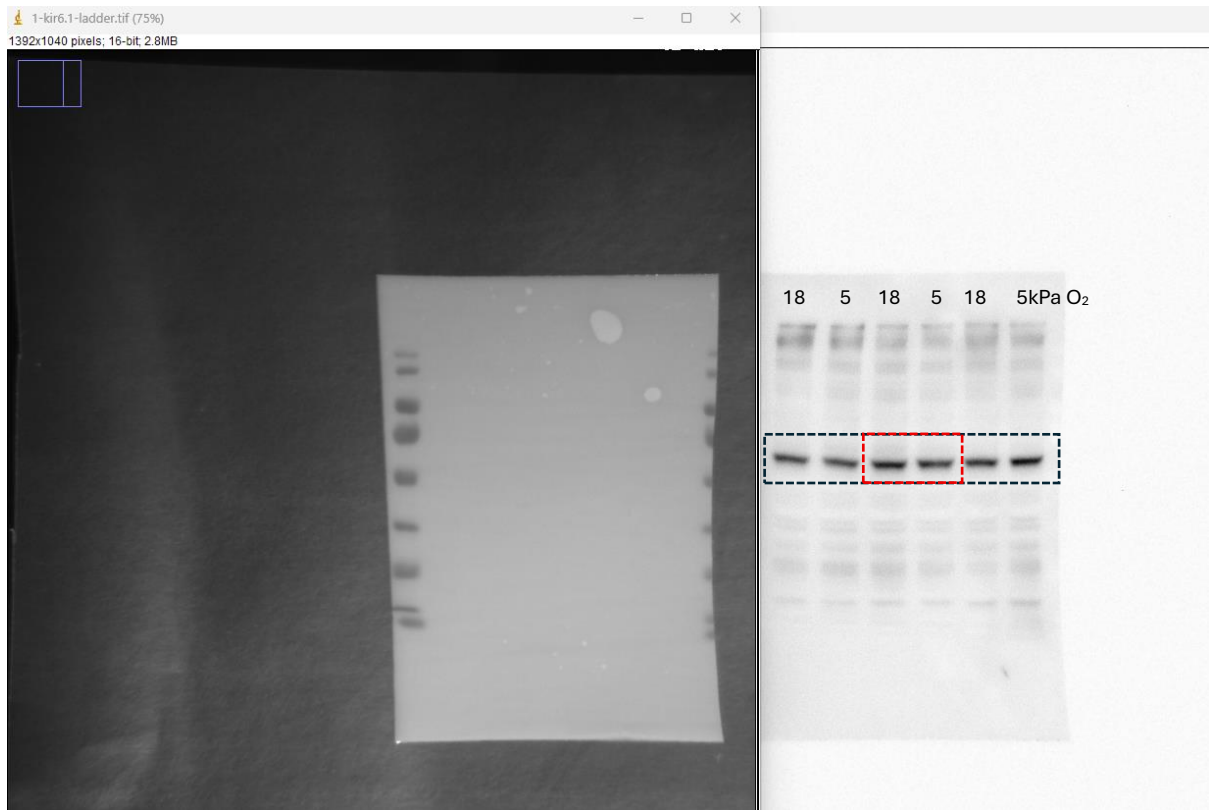

KCa2.3

Culture 1-3

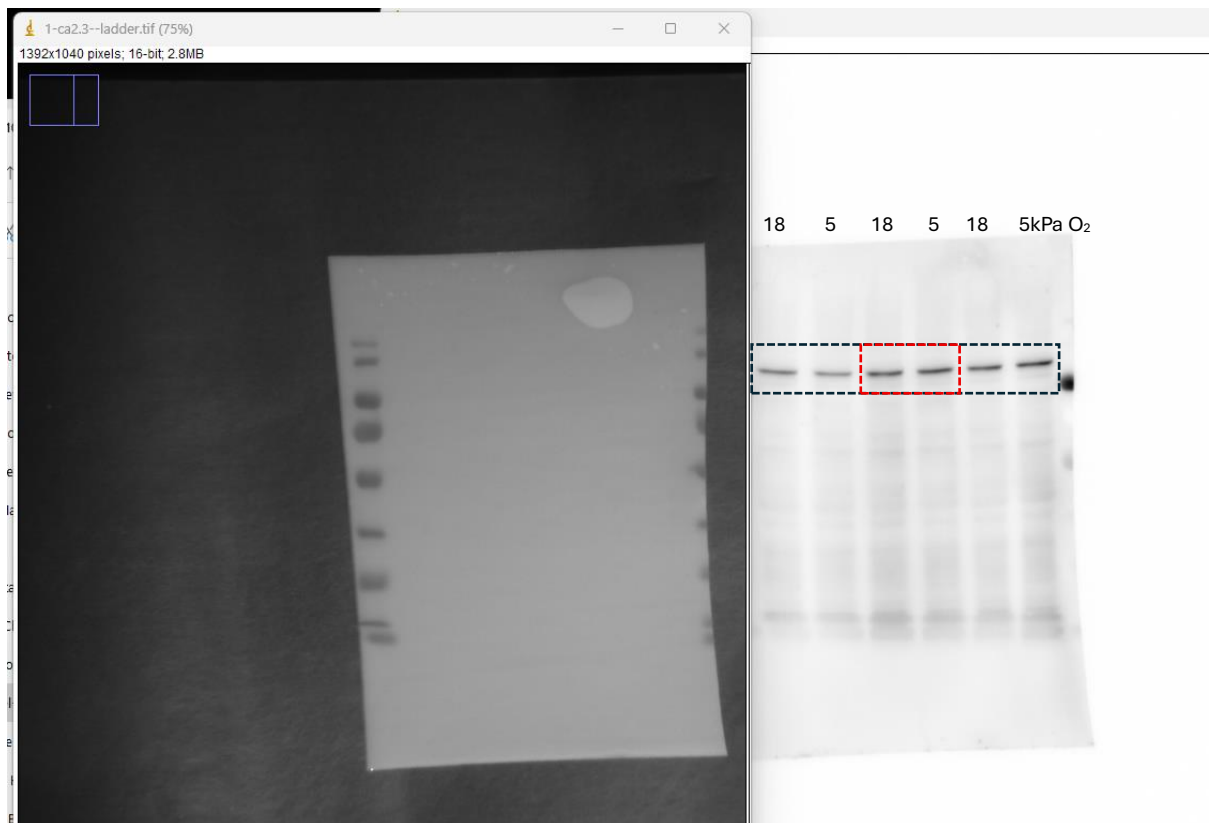

|                                   | 18kPa | 5kPa | 18kPa | 5kPa | 18kPa | 5kPa |         |
|-----------------------------------|-------|------|-------|------|-------|------|---------|
| Anti-KCNN3 (KCa2.3, SK3) (C-term) |       |      |       |      |       |      | ~100kDa |
| Anti-Kir6.1-KCNJ8                 |       |      |       |      |       |      | ~ 60kDa |
| $\beta$ -actin                    |       |      |       |      |       |      | 45kDa   |

4

## Antibody details:

**Anti-KCNN3 (K<sub>C</sub>2.3, SK3) (C-term) Antibody- Alomone Labs APC-103**

[https://www.alomone.com/p/anti-kca2-3-sk3-c-term/APC-103?srlid=AfmBOorba-bC\\_90e0rghvz3Ks01TaVI9RNNmTfdquoCgiuyzITyQZf2m](https://www.alomone.com/p/anti-kca2-3-sk3-c-term/APC-103?srlid=AfmBOorba-bC_90e0rghvz3Ks01TaVI9RNNmTfdquoCgiuyzITyQZf2m)

**Anti-K<sub>v</sub>6.1 (KCNJ8) Antibody- Abcam S366-60**

[https://www.alomone.com/p/anti-kir6-1/APC-105?gad\\_source=1&gclid=CjwKCAjw5qC2BhB8EiwAvqa41nQUqJj\\_QdLICZip4eelpz68ixFT\\_5mKQw90V\\_1drvLgRQmFvamxoC8yQQAvD\\_BwE](https://www.alomone.com/p/anti-kir6-1/APC-105?gad_source=1&gclid=CjwKCAjw5qC2BhB8EiwAvqa41nQUqJj_QdLICZip4eelpz68ixFT_5mKQw90V_1drvLgRQmFvamxoC8yQQAvD_BwE)

<https://www.abcam.com/en-us/products/primary-antibodies/kir61-kcnj8-antibody-s366-60-ab241996#>

**Mouse Anti-KCNN4 (K3.1, SK4) (extracellular) Antibody- Alomone Labs APC- 051**

[https://www.alomone.com/p/anti-kca3-1-sk4-extracellular/ALM-051?srlid=AfmBOooj3hps\\_jataFO4ti3OOPKihuylekzkipf3trW9O-JAbi974CvA](https://www.alomone.com/p/anti-kca3-1-sk4-extracellular/ALM-051?srlid=AfmBOooj3hps_jataFO4ti3OOPKihuylekzkipf3trW9O-JAbi974CvA)

**pageruler ladder**
